# Supplementary material for: The effect of a preconception care outreach strategy: the Healthy Pregnancy 4 All study
Source: Springer Nature journal article supplement (doi:10.1186/s12913-019-3882-y), 2019-01-23
Supplement: MOESM1 [file 16415616]

Additional file 1. The Framework of the Healthy Pregnancy 4 All PCC study<sup>1</sup>

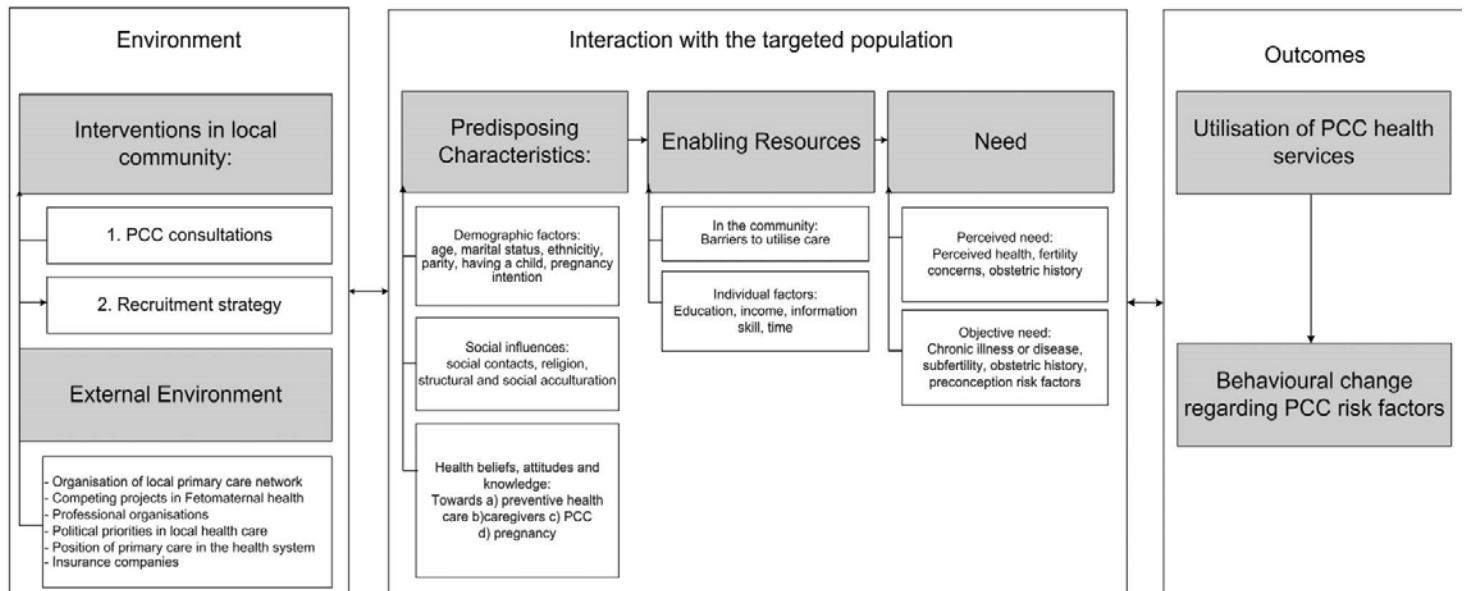

1. van Voorst SF, Vos AA, de Jong-Potjer LC, et al. Effectiveness of general preconception care accompanied by a recruitment approach: protocol of a community-based cohort study (the Healthy Pregnancy 4 All study). *BMJ Open* 2015;**5**(3):e006284.
