# Supplementary material for: The effect of a preconception care outreach strategy: the Healthy Pregnancy 4 All study
Source: Springer Nature journal article supplement (doi:10.1186/s12913-019-3882-y), 2019-01-23
Supplement: MOESM3 [file 16415616]

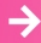

# Questionnaire 1

## Registration information:

1. What is your date of birth?   -   -     [DD-MM-YYYY]
2. What date is it today?   -   -     [DD-MM-YYYY]
3. What is your postal code?

## PART 1: Your visit to the Pre-Pregnancy Clinic:

The following questions are about your visit to the Pre-Pregnancy Clinic.

1. What was the most important reason for you to visit the Pre-Pregnancy Clinic? You can choose multiple answers.

- I would like information about becoming pregnant
- I would like information about a healthy pregnancy
- I worry whether I can become pregnant
- I worry about a healthy pregnancy
- There were problems during my previous pregnancy
- There were problems during a previous delivery
- Because it was advised
- Other reason:

2. How did you know about the Pre-Pregnancy Clinic? You can choose multiple answers.

- a letter from the Municipal Health Service
- a letter from my general practitioner
- the preventive child healthcare services
- my general practitioner
- my midwife
- another healthcare provider
- a peer health educators
- my partner
- a family member
- a friend
- someone from my neighborhood
- someone from my church, synagogue, mosque or temple
- a poster in the GP practice
- a poster in midwifery practice
- a leaflet in de GP practice
- a leaflet in midwifery practice
- de krant
- a magazine
- a webpage
- www.zwangerwijzer.nl
- other:

3. Do you know what a Peer (perinatal) Health Educator is?

- no (proceed to question 5)
- yes

4. What did the Peer Health Educator do for you?

- I did not use the Peer Health Educator
- I had a personal conversation with the Peer Health Educator
- I attended a group information meeting
- The Peer Health Educator made an appointment for me at the Pre-pregnancy Clinic
- The Peer Health Educator filled out www.zwangerwijzer.nl with me
- The Peer Health Educator joins me on my visit to the midwife

5. Explanation: A Peer (perinatal) Health Educator provides information about becoming pregnant and a healthy pregnancy. The peer educator can also help you to make an appointment at the Pre-Pregnancy Clinic. And she can go with you to the doctor or midwife.

If you had known what a Peer Health Educator could do for you, would you have used it?

- no  yes

6. Have you already discussed your desire to become pregnant with another health care provider? You can choose multiple answers.

- No  with my GP  with a midwife  with a gynecologist  other:

7. How much faith do you have in health care providers when it comes to discussing your desire to become pregnant?

Your GP

- very much  
 much  
 not much/ not little  
 little  
 very little

A midwife

- very much  
 much  
 not much/ not little  
 little  
 very little

A gynecologist:

- very much  
 much  
 not much/ not little  
 little  
 very little

8. Have you consulted other about becoming pregnant and a healthy pregnancy?

You can choose multiple answers:

- no  yes, family  yes, friends

9. If I had to, I would pay for the Pre-Pregnancy Clinic:

- no  yes, I would pay up to

## PART 2: Your health

The following questions are about your health, your desire to become pregnant, your fertility and possible previous pregnancies.

|                                                                                                                                                                                                                                                                                                                                                                          |
|--------------------------------------------------------------------------------------------------------------------------------------------------------------------------------------------------------------------------------------------------------------------------------------------------------------------------------------------------------------------------|
| 1. In general would you say your health is:<br><input type="checkbox"/> excellent <input type="checkbox"/> very good <input type="checkbox"/> good <input type="checkbox"/> fair <input type="checkbox"/> poor                                                                                                                                                           |
| 2. During a typical day, are you limited in activities of moderate effort, such as moving a table, pushing a vacuum cleaner or swimming?<br><input type="checkbox"/> yes, limited a lot <input type="checkbox"/> yes, limited a little <input type="checkbox"/> no, not limited at all                                                                                   |
| 3. During a typical day, are you limited in climbing several flights of stairs?<br><input type="checkbox"/> yes, limited a lot <input type="checkbox"/> yes, limited a little <input type="checkbox"/> no, not limited at all                                                                                                                                            |
| 4. Have you accomplished less in the past 4 weeks than you would like as a result of your physical health?<br><input type="checkbox"/> no <input type="checkbox"/> yes                                                                                                                                                                                                   |
| 5. Have you been limited in your work or other common activities as a result of your physical health during the past 4 weeks?<br><input type="checkbox"/> no <input type="checkbox"/> yes                                                                                                                                                                                |
| 6. Have you been able to do or achieve less in the past 4 weeks than you would like as a result of emotional problems (such as feeling depressed or anxious)?<br><input type="checkbox"/> no <input type="checkbox"/> yes                                                                                                                                                |
| 7. Did you not deal with your work or other activities as carefully as usual due to emotional problems?<br><input type="checkbox"/> no <input type="checkbox"/> yes                                                                                                                                                                                                      |
| 8. During the past 4 weeks, how much did pain interfere with your normal daily activities?<br><input type="checkbox"/> not at all <input type="checkbox"/> a little bit <input type="checkbox"/> moderately <input type="checkbox"/> Quite a bit <input type="checkbox"/> Extremely                                                                                      |
| 9. How much of the time during the past 4 weeks have you felt calm and peaceful?<br><input type="checkbox"/> not at all <input type="checkbox"/> a little bit <input type="checkbox"/> moderately <input type="checkbox"/> Quite a bit <input type="checkbox"/> Extremely                                                                                                |
| 10. How much of the time during the past 4 weeks did you have a lot of energy?<br><input type="checkbox"/> not at all <input type="checkbox"/> a little bit <input type="checkbox"/> moderately <input type="checkbox"/> Quite a bit <input type="checkbox"/> Extremely                                                                                                  |
| 11. How much of the time during the past 4 weeks have you felt downhearted and blue?<br><input type="checkbox"/> not at all <input type="checkbox"/> a little bit <input type="checkbox"/> moderately <input type="checkbox"/> Quite a bit <input type="checkbox"/> Extremely                                                                                            |
| 12. During the past 4 weeks, how much of the time has your physical health or emotional problems interfered with your social activities (like visiting with friends, relatives)<br><input type="checkbox"/> not at all <input type="checkbox"/> a little bit <input type="checkbox"/> moderately <input type="checkbox"/> Quite a bit <input type="checkbox"/> Extremely |

13. Has a doctor ever diagnosed one of these conditions with you?

You can choose multiple answers.

- arteriosclerosis coronary arteries / chest pain
- heart attack
- heart failure
- cerebral infarction or stroke
- arteriosclerosis in your legs
- a congenital heart defect
- no, none of the above

14. Are you currently using medication to lower your blood pressure?

- no
- yes

15. Have you ever measured too high blood sugar?

For example, during a disease, a medical examination or a previous pregnancy

- no
- yes

16. Do you have diabetes (diabetes type 1 or 2)?

- no
- yes

17. Does someone in your family have diabetes (type 1 or 2)?

- no
- yes, one or both parents, brother, sister or own child
- yes, other family members grandmother, aunt, uncle, nephew / niece

18. Was there any of the following conditions in one of your pregnancies?

You can check multiple answers:

- not applicable: I have not been pregnant before
- high blood pressure or pre-eclampsia
- gestational diabetes
- no, none of the above

### PART 3: Your Lifestyle

This part of the questionnaire is about your lifestyle.

1. How often do you eat vegetables or fruit?

- every day
- not every day

2. How much fruit do you usually eat per day?

Units

Explanation: 1 unit of fruit is:

1 larger piece of fruit such as an orange, apple, pear, banana, grapefruit

2 smaller pieces of fruit: such as plums, apricots, kiwis

6-8 small pieces of fruit such as: strawberries, blackberries, raspberries, grapes

3. How much servings of vegetables do you usually eat a day?

servings

4. Do you usually eat 100 grams of fish more than twice a week?

- no
- yes

5. Do you usually eat more than 90 grams of whole grain products a day?

- no
- yes

Explanation: What is 90 grams?

1 whole meal sandwich or rye bread = 30 grams

1 serving of muesli = 40 grams

1 portion of whole-wheat paste = 100 grams

6. You drink more than 450 kilocalories (Kcal) per week in drinks with added sugars

- no
- yes

Note: If you drink more than 8 glasses of lemonade or 3 cans of soft drinks (not light) per week, you can enter yes. (1 can (350 ml) soft drink (not light) = 150 Kcal, 1 glass of lemonade (150 ml) = 60 Kcal)

7. Do you follow a strict low-salt diet?  no  yes

8. Are you taking folic acid tablets at the moment?

- no, *continue to question 11*
- yes, tablets of 0.4 or 0.5mg folic acid.
- yes, tablets of 4 or 5mg folic acid (special high dosage)

9. Since how long do you take folic acid tablets?

weeks

10. How often do you take folic acid tablets?

- every day
- 1 to 3 times a week
- 4 to 6 times a week
- less than once a week

11. Do you use multivitamin tablets?

- no: go to question 14
- yes, multivitamin for pregnant women
- yes, multivitamin not specifically for pregnant women

12. Since how long do you take multivitamin tablets?

weeks

13. How often do you take multivitamin?

- every day
- 1 to 3 times a week
- 4 to 6 times a week
- less than once a week

14. Do you use vitamin D tablets?

- no
- yes, how much vitamin D is there in 1 tablet?  IU (international units)  
  microgram/  $\mu\text{g}$

15. Do you use cod liver oil or fish oil tablets?

- no
- yes

16. Do you have any of these bowel diseases? You can tick multiple answers.

- Ulcerative colitis
- Crohn's disease
- Celiac disease or gluten allergy
- a spastic intestine
- no, none of the above intestinal diseases

17. Do you wear a headscarf or veil?

no

yes

18. Do you move for at least 30 minutes per day (in your daily activities or during exercise)?

no

yes

20. How much exercise do you get per week?

minutes of moderate physical exercise

(Moderate exercise is for example: walking, cycling, housework, quiet swimming)

minutes of heavy physical exercise

(For example, heavy exercise is: running, racing bikes, swimming competitions, jumping rope, heavy work in the garden or at home)

21. Do you smoke?

no, I have never been a smoker: go to question 27

no, I am an ex-smoker: go to question 22

yes, occasionally: go to question 23

yes, daily: go to question 23

22. Since when did you quit?

Since   -   -     [DD-MM-YYYY]; go to question 24

23. Are you trying to quit now?

yes, I am trying to quit since:   -   -     [DD-MM-YYYY]

I reduce my smoking: go to question 25

no, I smoke as always: go to question 26

24. Have you smoked since your attempt to quit (even if it was only 1 cigarette or roll)?

no

yes

25. Do you use anything to stop or reduce smoking?

no

yes:

with a non-smoking course or group therapy

a smoking cessation clinic

a special stop smoking program from the midwife

I use nicotine chewing gum

I use nicotine patches

I use nicotine nasal spray

I take pills / a medication

other:

26. How much do you smoke on a normal day?  cigarettes / shags / cigars / cigarillos per day



27. Does your partner smoke?

- No, he has never been a smoker
- no, he is an ex-smoker
- yes, occasionally
- yes, daily

28. How long is there a total of smoking around you on a normal day? For example at home, at work or on occasions.

- rarely / never
- more than 3 hours a day
- 1 to 3 hours per day
- less than 1 hour per day

29. How often do you drink alcoholic beverages?

- never, go to question 39
- less than 1 glass per week
- 1 to 3 glasses per week
- 4 to 6 glasses per week
- 1 glass per day
- 1 to 3 glasses per day
- more than 3 glasses per day

30. Have you ever drunk more than 6 glasses in the past 3 months?

- no
- yes, that has happened in  times in the past 3 months

31. How many glasses of alcohol did you drink last week?

- Beer or wine
- Liquor

32. How often does your husband drink alcoholic drinks on a normal day on which he drinks?

- never
- less than 1 glass per week
- 1 to 3 glasses per week
- 4 to 6 glasses per week
- 1 glass per day
- 1 to 3 glasses per day
- more than 3 glasses per day

|                                                                                                                                                                                                                                                  |                                                                                                       |                                                              |                                                                                                       |                                                                                                       |                                                                                                       |
|--------------------------------------------------------------------------------------------------------------------------------------------------------------------------------------------------------------------------------------------------|-------------------------------------------------------------------------------------------------------|--------------------------------------------------------------|-------------------------------------------------------------------------------------------------------|-------------------------------------------------------------------------------------------------------|-------------------------------------------------------------------------------------------------------|
| <b>33. Do you use drugs?</b><br><input type="checkbox"/> no, never: go to question 35 <input type="checkbox"/> no, I stopped more than 1 week ago<br><input type="checkbox"/> no, I stopped less than 1 week ago<br><input type="checkbox"/> yes |                                                                                                       |                                                              |                                                                                                       |                                                                                                       |                                                                                                       |
| <b>34. Check what and how often you use (or used) drugs:</b>                                                                                                                                                                                     |                                                                                                       |                                                              |                                                                                                       |                                                                                                       |                                                                                                       |
| <b>Marijuana</b><br>(Hash, weed, Dutch weed, marijuana, skunk, stuff)                                                                                                                                                                            | <input type="checkbox"/> daily<br><input type="checkbox"/> weekly<br><input type="checkbox"/> monthly | <input type="checkbox"/> <b>Amphetamines</b><br>(Pep, Speed) | <input type="checkbox"/> daily<br><input type="checkbox"/> weekly<br><input type="checkbox"/> monthly | <input type="checkbox"/> <b>Phencyclidine</b><br>(Angel Dust)                                         | <input type="checkbox"/> daily<br><input type="checkbox"/> weekly<br><input type="checkbox"/> monthly |
| <input type="checkbox"/> <b>Cocaine</b><br>(coke)                                                                                                                                                                                                | <input type="checkbox"/> daily<br><input type="checkbox"/> weekly<br><input type="checkbox"/> monthly | <input type="checkbox"/> <b>Methamphetamine</b>              | <input type="checkbox"/> daily<br><input type="checkbox"/> weekly<br><input type="checkbox"/> monthly | <input type="checkbox"/> <b>GHB</b>                                                                   | <input type="checkbox"/> daily<br><input type="checkbox"/> weekly<br><input type="checkbox"/> monthly |
| <input type="checkbox"/> <b>Heroin</b>                                                                                                                                                                                                           | <input type="checkbox"/> daily<br><input type="checkbox"/> weekly<br><input type="checkbox"/> monthly | <input type="checkbox"/> <b>Methadone</b><br>(Symoron)       | <input type="checkbox"/> daily<br><input type="checkbox"/> weekly<br><input type="checkbox"/> monthly | <input type="checkbox"/> <b>Ecstasy</b><br>(XTC)                                                      | <input type="checkbox"/> daily<br><input type="checkbox"/> weekly<br><input type="checkbox"/> monthly |
| <input type="checkbox"/> <b>Another drug: namely:</b>                                                                                                                                                                                            |                                                                                                       | <input type="text"/>                                         |                                                                                                       | <input type="checkbox"/> daily<br><input type="checkbox"/> weekly<br><input type="checkbox"/> monthly |                                                                                                       |

|                                                                                                                                                                                                                                                                                                                                                                 |  |
|-----------------------------------------------------------------------------------------------------------------------------------------------------------------------------------------------------------------------------------------------------------------------------------------------------------------------------------------------------------------|--|
| <b>35. Are you actively doing something now to gain weight?</b><br><input type="checkbox"/> no <input type="checkbox"/> yes:                                                                                                                                                                                                                                    |  |
| <input type="checkbox"/> I visit a dietitian<br><input type="checkbox"/> I have changed my diet <input type="text"/><br><input type="checkbox"/> something else: namely:                                                                                                                                                                                        |  |
| <b>36. Are you actively doing something to lose weight now?</b><br><input type="checkbox"/> no <input type="checkbox"/> yes:                                                                                                                                                                                                                                    |  |
| <input type="checkbox"/> I visit a dietitian<br><input type="checkbox"/> I move or exercise more<br><input type="checkbox"/> I have changed my diet<br><input type="checkbox"/> I use a means to lose weight (for example: pills, drinks)<br><input type="checkbox"/> I visit a clinic<br><input type="checkbox"/> something else: namely: <input type="text"/> |  |

|                                                                                                                                                                                                    |  |  |
|----------------------------------------------------------------------------------------------------------------------------------------------------------------------------------------------------|--|--|
| <b>37. Do you change the litter box at home?</b><br><input type="checkbox"/> no <input type="checkbox"/> yes <input type="checkbox"/> I do not have a cat or litter box                            |  |  |
| <b>38. Do you garden?</b><br><input type="checkbox"/> no <input type="checkbox"/> yes, without gloves <input type="checkbox"/> I do not have a garden<br><input type="checkbox"/> yes, with gloves |  |  |

39. When is it advisable to stop habits that can be harmful to the baby in the womb?

- when stopping contraception
- after unprotected sexual intercourse
- after the pregnancy test is positive
- do not know

## PART 4: pregnancy planning and fertility

This part of the questionnaire is about planning a pregnancy and fertility.

### PREGNANCY PLANNING

1. Do you or your partner use contraceptives?

no

yes: enter which contraceptives you use:

the birth control pill

IUD with hormone

IUD without hormones

condoms

contraceptive injections

the contraceptive implant (in the arm)

sterilization

other:

2. Since when are you trying to become pregnant?

not yet

since we stopped using contraceptives: month: \_\_\_\_\_ year:

other, since: month: \_\_\_\_\_ year:

3. What are your thoughts on becoming pregnant?

I am pregnant

I intend to become pregnant:

within the next 3 months

within the next 3 – 6 months

after 6 months

maybe I decide not to become pregnant

### FERTILITY

4. How long is your menstrual cycle?

Explanation: This is the time between the start of the bleeding until the next bleeding.

shorter than 3 weeks

3 to 5 weeks

longer than 5 weeks, but regularly

irregular

I do not know

5. Are you currently undergoing treatment to become pregnant?

no

yes

6. Have you previously had treatments to become pregnant?

no

yes

## PART 5: Your pregnancies

This part of the questionnaire is about whether you have been pregnant.

### PREGNANCY

1. Have you been pregnant before?

Explanation: a miscarriage or abortion also count as a pregnancy

no

yes: *continue to question 2A/2B/2C/ 2D*

*continue to part 6*

The following applies: If you have had twins (or triplets), you can enter this as two deliveries. By the date of birth of the babies, we know that they were twins.

### 2A Your first pregnancy:

2A1 Fill in when and how your pregnancy ended:

|                                                                                                 |                                                                                                                                                                                               |
|-------------------------------------------------------------------------------------------------|-----------------------------------------------------------------------------------------------------------------------------------------------------------------------------------------------|
| <input type="checkbox"/> a full-term pregnancy with a delivery on                               | <input type="text"/> <input type="text"/> - <input type="text"/> <input type="text"/> - <input type="text"/> <input type="text"/> <input type="text"/> <input type="text"/><br>DD – MM - YYYY |
| <input type="checkbox"/> a miscarriage<br><i>Continue to 2B</i>                                 | month: _____ year: <input type="text"/> <input type="text"/> <input type="text"/> <input type="text"/>                                                                                        |
| <input type="checkbox"/> an ectopic pregnancy<br><i>Continue to 2B</i>                          | month: _____ year: <input type="text"/> <input type="text"/> <input type="text"/> <input type="text"/>                                                                                        |
| <input type="checkbox"/> an abortion (at own request)<br><i>Continue to 2B</i>                  | month: _____ year: <input type="text"/> <input type="text"/> <input type="text"/> <input type="text"/>                                                                                        |
| <input type="checkbox"/> a termination of pregnancy on medical grounds<br><i>Continue to 2B</i> | month: _____ year: <input type="text"/> <input type="text"/> <input type="text"/> <input type="text"/>                                                                                        |

2 A2 Was your child:  a boy  a girl

2 A3 What was the weight of your baby at birth?  gram

2 A4 How was your baby born?

- vaginal delivery (not assisted)
- assisted vaginal delivery
- caesarean section

Explanation: an assisted delivery is for example a vacuum-assisted or forceps-assisted delivery.

2 A5 Was your baby born prematurely?

- no, after the 37th week of pregnancy
- yes; the baby was born when I was ... weeks pregnant

2 A6 Was there any of the following problems? You can choose multiple answers

- one or more congenital abnormalities
- your baby was stillborn when you were .... weeks pregnant
- your baby died in the first month after delivery

### 2 B Your second pregnancy:

2 B1 Fill in when and how your pregnancy ended:

|                                                                                                 |                                                                                                                                                                                               |
|-------------------------------------------------------------------------------------------------|-----------------------------------------------------------------------------------------------------------------------------------------------------------------------------------------------|
| <input type="checkbox"/> a full-term pregnancy with a delivery on                               | <input type="text"/> <input type="text"/> - <input type="text"/> <input type="text"/> - <input type="text"/> <input type="text"/> <input type="text"/> <input type="text"/><br>DD – MM - YYYY |
| <input type="checkbox"/> a miscarriage<br><i>Continue to 2C</i>                                 | month: _____ year: <input type="text"/> <input type="text"/> <input type="text"/> <input type="text"/>                                                                                        |
| <input type="checkbox"/> an ectopic pregnancy<br><i>Continue to 2C</i>                          | month: _____ year: <input type="text"/> <input type="text"/> <input type="text"/> <input type="text"/>                                                                                        |
| <input type="checkbox"/> an abortion (at own request)<br><i>Continue to 2C</i>                  | month: _____ year: <input type="text"/> <input type="text"/> <input type="text"/> <input type="text"/>                                                                                        |
| <input type="checkbox"/> a termination of pregnancy on medical grounds<br><i>Continue to 2C</i> | month: _____ year: <input type="text"/> <input type="text"/> <input type="text"/> <input type="text"/>                                                                                        |

2 B2 Was your child:  a boy  a girl

2 B3 What was the weight of your baby at birth?  gram

2 B4 How was your baby born?

- vaginal delivery (not assisted)
- assisted vaginal delivery
- caesarean section

Explanation: an assisted delivery is for example a vacuum-assisted or forceps-assisted delivery.

2 B5 Was your baby born prematurely?

- no, after the 37th week of pregnancy
- yes; the baby was born when I was ... weeks pregnant

2 B6 Was there any of the following problems? You can choose multiple answers

- one or more congenital abnormalities
- your baby was stillborn when you were .... weeks pregnant
- your baby died in the first month after delivery

**2 C Your third pregnancy:**

2 C1 Fill in when and how your pregnancy ended:

|                                                                                                 |                                                                                                                                                                                               |
|-------------------------------------------------------------------------------------------------|-----------------------------------------------------------------------------------------------------------------------------------------------------------------------------------------------|
| <input type="checkbox"/> a full-term pregnancy with a delivery on                               | <input type="text"/> <input type="text"/> - <input type="text"/> <input type="text"/> - <input type="text"/> <input type="text"/> <input type="text"/> <input type="text"/><br>DD – MM - YYYY |
| <input type="checkbox"/> a miscarriage<br><i>Continue to 2D</i>                                 | month: _____ year: <input type="text"/> <input type="text"/> <input type="text"/> <input type="text"/>                                                                                        |
| <input type="checkbox"/> an ectopic pregnancy<br><i>Continue to 2D</i>                          | month: _____ year: <input type="text"/> <input type="text"/> <input type="text"/> <input type="text"/>                                                                                        |
| <input type="checkbox"/> an abortion (at own request)<br><i>Continue to 2D</i>                  | month: _____ year: <input type="text"/> <input type="text"/> <input type="text"/> <input type="text"/>                                                                                        |
| <input type="checkbox"/> a termination of pregnancy on medical grounds<br><i>Continue to 2D</i> | month: _____ year: <input type="text"/> <input type="text"/> <input type="text"/> <input type="text"/>                                                                                        |

2 C2 Was your child:  a boy  a girl

2 C3 What was the weight of your baby at birth?  gram

2 C4 How was your baby born?

- vaginal delivery (not assisted)
- assisted vaginal delivery
- caesarean section

Explanation: an assisted delivery is for example a vacuum-assisted or forceps-assisted delivery.

2 C5 Was your baby born prematurely?

- no, after the 37th week of pregnancy
- yes; the baby was born when I was ... weeks pregnant

2 C6 Was there any of the following problems? You can choose multiple answers

- one or more congenital abnormalities
- your baby was stillborn when you were .... weeks pregnant
- your baby died in the first month after delivery

## 2 D Your fourth pregnancy:

2 D1 Fill in when and how your pregnancy ended:

|                                                                                                |                                                                                                                                                                                               |
|------------------------------------------------------------------------------------------------|-----------------------------------------------------------------------------------------------------------------------------------------------------------------------------------------------|
| <input type="checkbox"/> a full-term pregnancy with a delivery on                              | <input type="text"/> <input type="text"/> - <input type="text"/> <input type="text"/> - <input type="text"/> <input type="text"/> <input type="text"/> <input type="text"/><br>DD – MM - YYYY |
| <input type="checkbox"/> a miscarriage<br><i>Continue to 3</i>                                 | month: _____ year: <input type="text"/> <input type="text"/> <input type="text"/> <input type="text"/>                                                                                        |
| <input type="checkbox"/> an ectopic pregnancy<br><i>Continue to 3</i>                          | month: _____ year: <input type="text"/> <input type="text"/> <input type="text"/> <input type="text"/>                                                                                        |
| <input type="checkbox"/> an abortion (at own request)<br><i>Continue to 3</i>                  | month: _____ year: <input type="text"/> <input type="text"/> <input type="text"/> <input type="text"/>                                                                                        |
| <input type="checkbox"/> a termination of pregnancy on medical grounds<br><i>Continue to 3</i> | month: _____ year: <input type="text"/> <input type="text"/> <input type="text"/> <input type="text"/>                                                                                        |

2 D2 Was your child:  a boy  a girl

2 D3 What was the weight of your baby at birth?  gram

2 D4 How was your baby born?

- vaginal delivery (not assisted)
- assisted vaginal delivery
- caesarean section

Explanation: an assisted delivery is for example a vacuum-assisted or forceps-assisted delivery.

2 D5 Was your baby born prematurely?

- no, after the 37th week of pregnancy
- yes; the baby was born when I was ... weeks pregnant

2 D6 Was there any of the following problems? You can choose multiple answers

- one or more congenital abnormalities
- your baby was stillborn when you were .... weeks pregnant
- your baby died in the first month after delivery

3. How many living children do you have?  children

## PART 6: General information about you:

This part of the questionnaire is about you and your background.

1. Are you:       married                                       in a relationship but not living together  
                          living together with partner       single

2. With whom do you share your household?

- with  adults (count your partner)  
 with  children under the age of 18  
 children under the age of 18

3. Do you have a paid job       no                                       yes:  hours per week

4. What is the net income of your household per month in euros?

- less than 1000 euros per month  
 1000 to 1500 euros per month  
 1500 to 2000 euros per month  
 2000 to 2500 euros per month  
 2500 to 3000 euros per month  
 more than 3000 euros per month

Explanation: Net income is: the amount that you receive on your account or in your hands. Calculate the income that comes in for all people in your household. In addition to your possible income, you can also include benefits or gifts through work.

5. Do you have health insurance?

- no  
 yes

6. What is the highest level of education that you have completed?

- none  
 primary school  
 secondary education:  
     Preparatory vocational education (VBO)/preparatory vocational secondary education (VMBO) basic vocational or advanced vocational track  
     Junior general secondary education (MAVO)/preparatory vocational secondary education (VMBO) combined or theoretical track  
     Senior general secondary education (HAVO)  
     Pre-university education (VWO)  
 Senior secondary vocational education (MBO)  
 Higher professional education (HBO)  
 University education (university/post HBO)  
 Education abroad:



7. Which population group do you consider yourself part of?

- |                                              |                                                      |
|----------------------------------------------|------------------------------------------------------|
| <input type="checkbox"/> Dutch               | <input type="checkbox"/> Antillean/Aruban            |
| <input type="checkbox"/> Suriname-Creole     | <input type="checkbox"/> Indonesian/Moluccan         |
| <input type="checkbox"/> Suriname-Hindustani | <input type="checkbox"/> Turkish                     |
| <input type="checkbox"/> Suriname-Javan      | <input type="checkbox"/> Kurdish                     |
| <input type="checkbox"/> Suriname - other:   | <input type="checkbox"/> Moroccan: Berbers           |
| <input type="text"/>                         | <input type="checkbox"/> Moroccan: Arabic            |
|                                              | <input type="checkbox"/> Polish                      |
|                                              | <input type="checkbox"/> Other: <input type="text"/> |

8. In which country were you born?

- |                                                   |                                                      |
|---------------------------------------------------|------------------------------------------------------|
| <input type="checkbox"/> The Netherlands          | <input type="checkbox"/> Turkey                      |
| <input type="checkbox"/> Suriname                 | <input type="checkbox"/> Morocco                     |
| <input type="checkbox"/> Antilles/ Aruba          | <input type="checkbox"/> Other: <input type="text"/> |
| <input type="checkbox"/> Indonesia / the Moluccas |                                                      |

9. In which country was your mother born?

- |                                                   |                                                      |
|---------------------------------------------------|------------------------------------------------------|
| <input type="checkbox"/> The Netherlands          | <input type="checkbox"/> Turkey                      |
| <input type="checkbox"/> Suriname                 | <input type="checkbox"/> Morocco                     |
| <input type="checkbox"/> Antilles/ Aruba          | <input type="checkbox"/> Other: <input type="text"/> |
| <input type="checkbox"/> Indonesia / the Moluccas |                                                      |

10. In which country was your father born?

- |                                                   |                                                      |
|---------------------------------------------------|------------------------------------------------------|
| <input type="checkbox"/> The Netherlands          | <input type="checkbox"/> Turkey                      |
| <input type="checkbox"/> Suriname                 | <input type="checkbox"/> Morocco                     |
| <input type="checkbox"/> Antilles/ Aruba          | <input type="checkbox"/> Other: <input type="text"/> |
| <input type="checkbox"/> Indonesia / the Moluccas |                                                      |

11. What is your mother tongue?

- |                                                  |                                            |                                         |
|--------------------------------------------------|--------------------------------------------|-----------------------------------------|
| <input type="checkbox"/> Dutch                   | <input type="checkbox"/> Turkish           | <input type="checkbox"/> English        |
| <input type="checkbox"/> Surinamese Sranan Tongo | <input type="checkbox"/> Kurdish           | <input type="checkbox"/> Other, namely: |
| <input type="checkbox"/> Surinamese Hindustani   | <input type="checkbox"/> Arabic            | <input type="text"/>                    |
| <input type="checkbox"/> Papiamentu              | <input type="checkbox"/> Berbers           |                                         |
| <input type="checkbox"/> Indonesian / Moluccan   | <input type="checkbox"/> Chinese, Mandarin |                                         |

12. How well can you understand Dutch?

- not at all       a little       it goes       reasonably good       very well

13. How well can you read Dutch?

- not at all       a little       it goes       reasonably good       very well

14. How well can you speak Dutch?

- not at all       a little       it goes       reasonably good       very well

15. How well can you write Dutch?

- not at all       a little       it goes       reasonably good       very well



25. How often do you have contact with Dutch friends or acquaintances?

- every day     1x per week     at least  
1 x per month     1 or a few  
times a year     less than  
1 x per year     not  
applicable

26. How often do you have contact with immigrant friends or acquaintances?

- every day     1x per week     at least  
1 x per month     1 or a few  
times a year     less than  
1 x per year     not  
applicable

## PART 7: YOUR IDEAS ABOUT HEALTH, THE PRE-PREGNANCY CLINIC (PCC CONSULTATION) AND PREGNANCY:

This part of the questionnaire is about your ideas and facts about health, getting pregnant and wanting to have children.

| Statements are listed below. Tick the extent to which you agree or disagree with it.                                                                                                             |                                            |                                   |                                        |                                      |                                               |
|--------------------------------------------------------------------------------------------------------------------------------------------------------------------------------------------------|--------------------------------------------|-----------------------------------|----------------------------------------|--------------------------------------|-----------------------------------------------|
| 1. I take part or will participate in screening for cervical cancer after my 30th.                                                                                                               | <input type="checkbox"/><br>Strongly agree | <input type="checkbox"/><br>Agree | <input type="checkbox"/><br>No opinion | <input type="checkbox"/><br>disagree | <input type="checkbox"/><br>Strongly disagree |
| 2. I find it positive that you can visit a healthcare provider to discuss your pregnancy desire.                                                                                                 | <input type="checkbox"/><br>Strongly agree | <input type="checkbox"/><br>Agree | <input type="checkbox"/><br>No opinion | <input type="checkbox"/><br>disagree | <input type="checkbox"/><br>Strongly disagree |
| 3. I find it uneasy to discuss getting pregnant with my GP or midwife                                                                                                                            | <input type="checkbox"/><br>Strongly agree | <input type="checkbox"/><br>Agree | <input type="checkbox"/><br>No opinion | <input type="checkbox"/><br>disagree | <input type="checkbox"/><br>Strongly disagree |
| 4. When you have a PCC consultation chances are greater that you will have a healthy pregnancy.                                                                                                  | <input type="checkbox"/><br>Strongly agree | <input type="checkbox"/><br>Agree | <input type="checkbox"/><br>No opinion | <input type="checkbox"/><br>disagree | <input type="checkbox"/><br>Strongly disagree |
| 5. It is not necessary to have a PCC consultation before you are pregnant                                                                                                                        | <input type="checkbox"/><br>Strongly agree | <input type="checkbox"/><br>Agree | <input type="checkbox"/><br>No opinion | <input type="checkbox"/><br>disagree | <input type="checkbox"/><br>Strongly disagree |
| 6. Visiting a healthcare provider for a PCC consultation makes me medicalize 'becoming pregnant'                                                                                                 | <input type="checkbox"/><br>Strongly agree | <input type="checkbox"/><br>Agree | <input type="checkbox"/><br>No opinion | <input type="checkbox"/><br>disagree | <input type="checkbox"/><br>Strongly disagree |
| 7. Because of a PCC consultation I feel pressured to have a perfect baby                                                                                                                         | <input type="checkbox"/><br>Strongly agree | <input type="checkbox"/><br>Agree | <input type="checkbox"/><br>No opinion | <input type="checkbox"/><br>disagree | <input type="checkbox"/><br>Strongly disagree |
| 8. I am afraid of having a PCC consultation because I am afraid of a gynecological examination                                                                                                   | <input type="checkbox"/><br>Strongly agree | <input type="checkbox"/><br>Agree | <input type="checkbox"/><br>No opinion | <input type="checkbox"/><br>disagree | <input type="checkbox"/><br>Strongly disagree |
| 9. I would have my child vaccinated in the national vaccination program.                                                                                                                         | <input type="checkbox"/><br>Strongly agree | <input type="checkbox"/><br>Agree | <input type="checkbox"/><br>No opinion | <input type="checkbox"/><br>disagree | <input type="checkbox"/><br>Strongly disagree |
| 10. I do not appreciate that a healthcare provider interferes with my pregnancy desire                                                                                                           | <input type="checkbox"/><br>Strongly agree | <input type="checkbox"/><br>Agree | <input type="checkbox"/><br>No opinion | <input type="checkbox"/><br>disagree | <input type="checkbox"/><br>Strongly disagree |
| 11. I am afraid of negative responses from the people around me when I have a PCC consultation                                                                                                   | <input type="checkbox"/><br>Strongly agree | <input type="checkbox"/><br>Agree | <input type="checkbox"/><br>No opinion | <input type="checkbox"/><br>disagree | <input type="checkbox"/><br>Strongly disagree |
| 12. You owe it to your baby to do everything within your possibilities for the health of your baby.                                                                                              | <input type="checkbox"/><br>Strongly agree | <input type="checkbox"/><br>Agree | <input type="checkbox"/><br>No opinion | <input type="checkbox"/><br>disagree | <input type="checkbox"/><br>Strongly disagree |
| 13. Because of my health and / or previous childbirth (s) there is a chance that my baby will be born prematurely.                                                                               | <input type="checkbox"/><br>Strongly agree | <input type="checkbox"/><br>Agree | <input type="checkbox"/><br>No opinion | <input type="checkbox"/><br>disagree | <input type="checkbox"/><br>Strongly disagree |
| 14. Because of my health and / or previous pregnancy (s) there is a chance that my baby has a congenital abnormality.                                                                            | <input type="checkbox"/><br>Strongly agree | <input type="checkbox"/><br>Agree | <input type="checkbox"/><br>No opinion | <input type="checkbox"/><br>disagree | <input type="checkbox"/><br>Strongly disagree |
| 15. Because of my health and / or previous childbirth (s) there is a chance that my baby does not grow well during pregnancy.                                                                    | <input type="checkbox"/><br>Strongly agree | <input type="checkbox"/><br>Agree | <input type="checkbox"/><br>No opinion | <input type="checkbox"/><br>disagree | <input type="checkbox"/><br>Strongly disagree |
| 16. It is difficult for me to visit a GP or midwife due to practical reasons (for example, not being able to take time off from work, not being able to find a babysitter, having no transport). | <input type="checkbox"/><br>Strongly agree | <input type="checkbox"/><br>Agree | <input type="checkbox"/><br>No opinion | <input type="checkbox"/><br>disagree | <input type="checkbox"/><br>Strongly disagree |

|                                                                                                                                                |                                            |                                   |                                        |                                      |                                               |
|------------------------------------------------------------------------------------------------------------------------------------------------|--------------------------------------------|-----------------------------------|----------------------------------------|--------------------------------------|-----------------------------------------------|
| 17. I find it difficult to make an appointment with my GP or midwife at a suitable moment for me                                               | <input type="checkbox"/><br>Strongly agree | <input type="checkbox"/><br>Agree | <input type="checkbox"/><br>No opinion | <input type="checkbox"/><br>disagree | <input type="checkbox"/><br>Strongly disagree |
| 18. It takes too much time for me to go to a preconception care consultation                                                                   | <input type="checkbox"/><br>Strongly agree | <input type="checkbox"/><br>Agree | <input type="checkbox"/><br>No opinion | <input type="checkbox"/><br>disagree | <input type="checkbox"/><br>Strongly disagree |
| 19. I look for information to have a healthy pregnancy in other ways (e.g. internet)                                                           | <input type="checkbox"/><br>Strongly agree | <input type="checkbox"/><br>Agree | <input type="checkbox"/><br>No opinion | <input type="checkbox"/><br>disagree | <input type="checkbox"/><br>Strongly disagree |
| 20. I have enough knowledge about what to do to have a healthy pregnancy                                                                       | <input type="checkbox"/><br>Strongly agree | <input type="checkbox"/><br>Agree | <input type="checkbox"/><br>No opinion | <input type="checkbox"/><br>disagree | <input type="checkbox"/><br>Strongly disagree |
| <b>Statements are listed below. Tick the box that suits your opinion.</b>                                                                      |                                            |                                   |                                        |                                      |                                               |
| 21. Whether you are healthy or not, everyone can improve something in preparation for a pregnancy.                                             | <input type="checkbox"/><br>True           |                                   | <input type="checkbox"/><br>Not true   |                                      | <input type="checkbox"/><br>I do not know     |
| 22. When you smoke, you become pregnant less quickly                                                                                           | <input type="checkbox"/><br>True           |                                   | <input type="checkbox"/><br>Not true   |                                      | <input type="checkbox"/><br>I do not know     |
| 23. When you have a very low weight, you become pregnant less quickly                                                                          | <input type="checkbox"/><br>True           |                                   | <input type="checkbox"/><br>Not true   |                                      | <input type="checkbox"/><br>I do not know     |
| 24. When you have a very high weight, you become pregnant less quickly                                                                         | <input type="checkbox"/><br>True           |                                   | <input type="checkbox"/><br>Not true   |                                      | <input type="checkbox"/><br>I do not know     |
| 25. The Pre-pregnancy clinic (or a preconception care consultation) is intended for women who have difficulty getting pregnant.                | <input type="checkbox"/><br>True           |                                   | <input type="checkbox"/><br>Not true   |                                      | <input type="checkbox"/><br>I do not know     |
| 26. All medications that you can buy at a pharmacy are safe: you can take them during pregnancy                                                | <input type="checkbox"/><br>True           |                                   | <input type="checkbox"/><br>Not true   |                                      | <input type="checkbox"/><br>I do not know     |
| 27. You do not need to take folic acid supplementation until you know that you are pregnant                                                    | <input type="checkbox"/><br>True           |                                   | <input type="checkbox"/><br>Not true   |                                      | <input type="checkbox"/><br>I do not know     |
| 28. The Pre-pregnancy clinic (or a preconception care consultation) is intended for women who have previously had a child who was not healthy. | <input type="checkbox"/><br>True           |                                   | <input type="checkbox"/><br>Not true   |                                      | <input type="checkbox"/><br>I do not know     |
| 29. When you want to become pregnant, you should stop eating raw meat or fish                                                                  | <input type="checkbox"/><br>True           |                                   | <input type="checkbox"/><br>Not true   |                                      | <input type="checkbox"/><br>I do not know     |
| 30. When you want to become pregnant, you should stop eating a lot of liver                                                                    | <input type="checkbox"/><br>True           |                                   | <input type="checkbox"/><br>Not true   |                                      | <input type="checkbox"/><br>I do not know     |
| 31. The Pre-pregnancy clinic (or a preconception care consultation) is intended for women who have a disease themselves.                       | <input type="checkbox"/><br>True           |                                   | <input type="checkbox"/><br>Not true   |                                      | <input type="checkbox"/><br>I do not know     |
| 32. Drugs are not yet harmful in the beginning of pregnancy                                                                                    | <input type="checkbox"/><br>True           |                                   | <input type="checkbox"/><br>Not true   |                                      | <input type="checkbox"/><br>I do not know     |
