# Supplementary material for: The effect of a preconception care outreach strategy: the Healthy Pregnancy 4 All study
Source: Springer Nature journal article supplement (doi:10.1186/s12913-019-3882-y), 2019-01-23
Supplement: MOESM4 [file 16415616]

*Manuscript: The effect of a preconception care outreach strategy: The Healthy Pregnancy 4 All study*

*Additional file 4. Uptake of PCC applications after sending municipal invitation letters diminishes over time.*

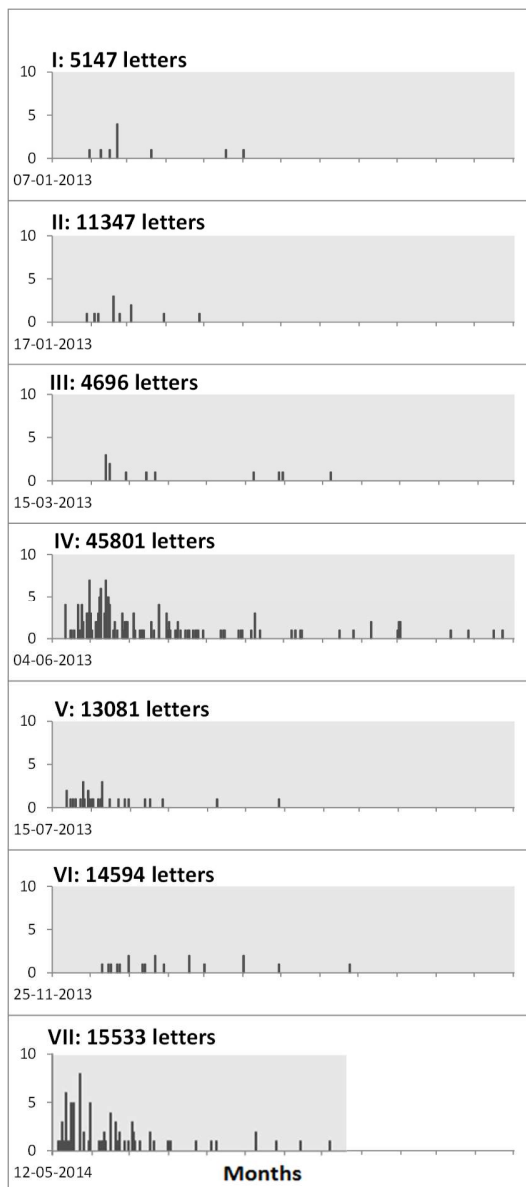

Date and number of municipal letters sent differed per municipality. Number of PCC applications are shown for a period of a year.\*

\*Follow up of municipality VII was limited due to ending of the study.
