# Supplementary material for: The effect of a preconception care outreach strategy: the Healthy Pregnancy 4 All study
Source: Springer Nature journal article supplement (doi:10.1186/s12913-019-3882-y), 2019-01-23

Additional file 5. Barrier, beliefs and knowledge response per statement (N=237)

Figure 1. Barrier outcome per statement

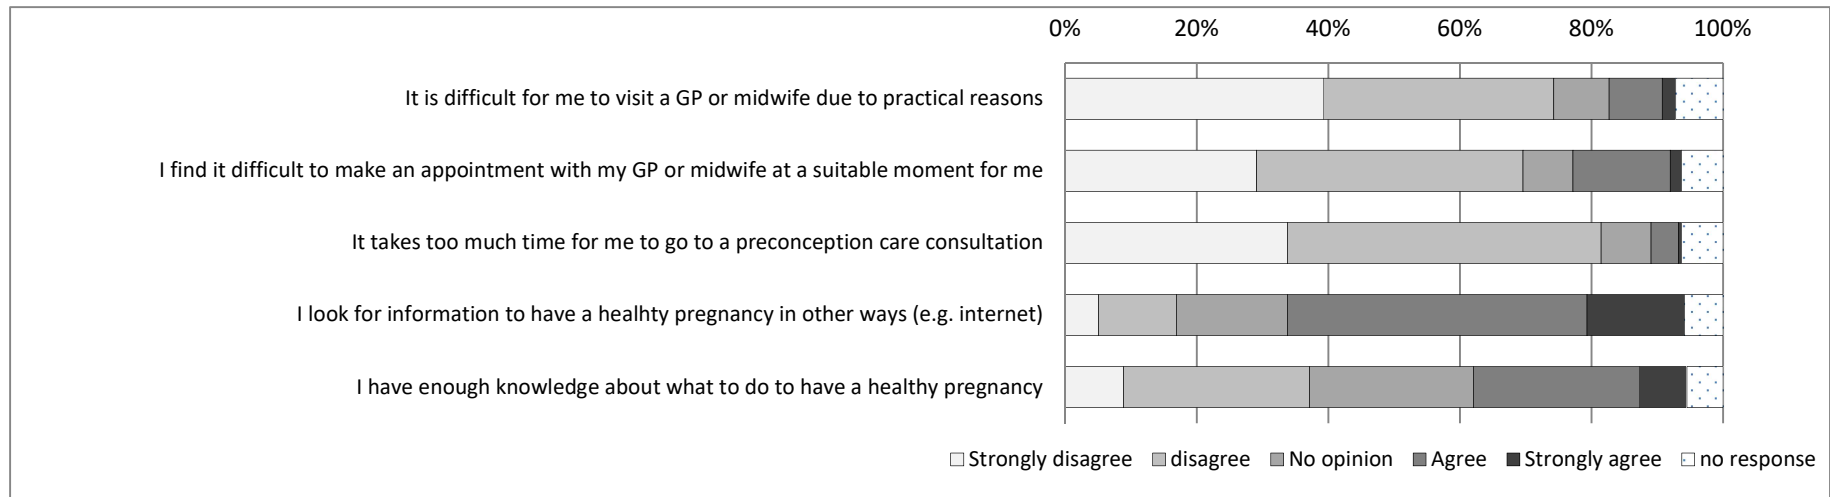

Figure 2. Beliefs outcome per statement

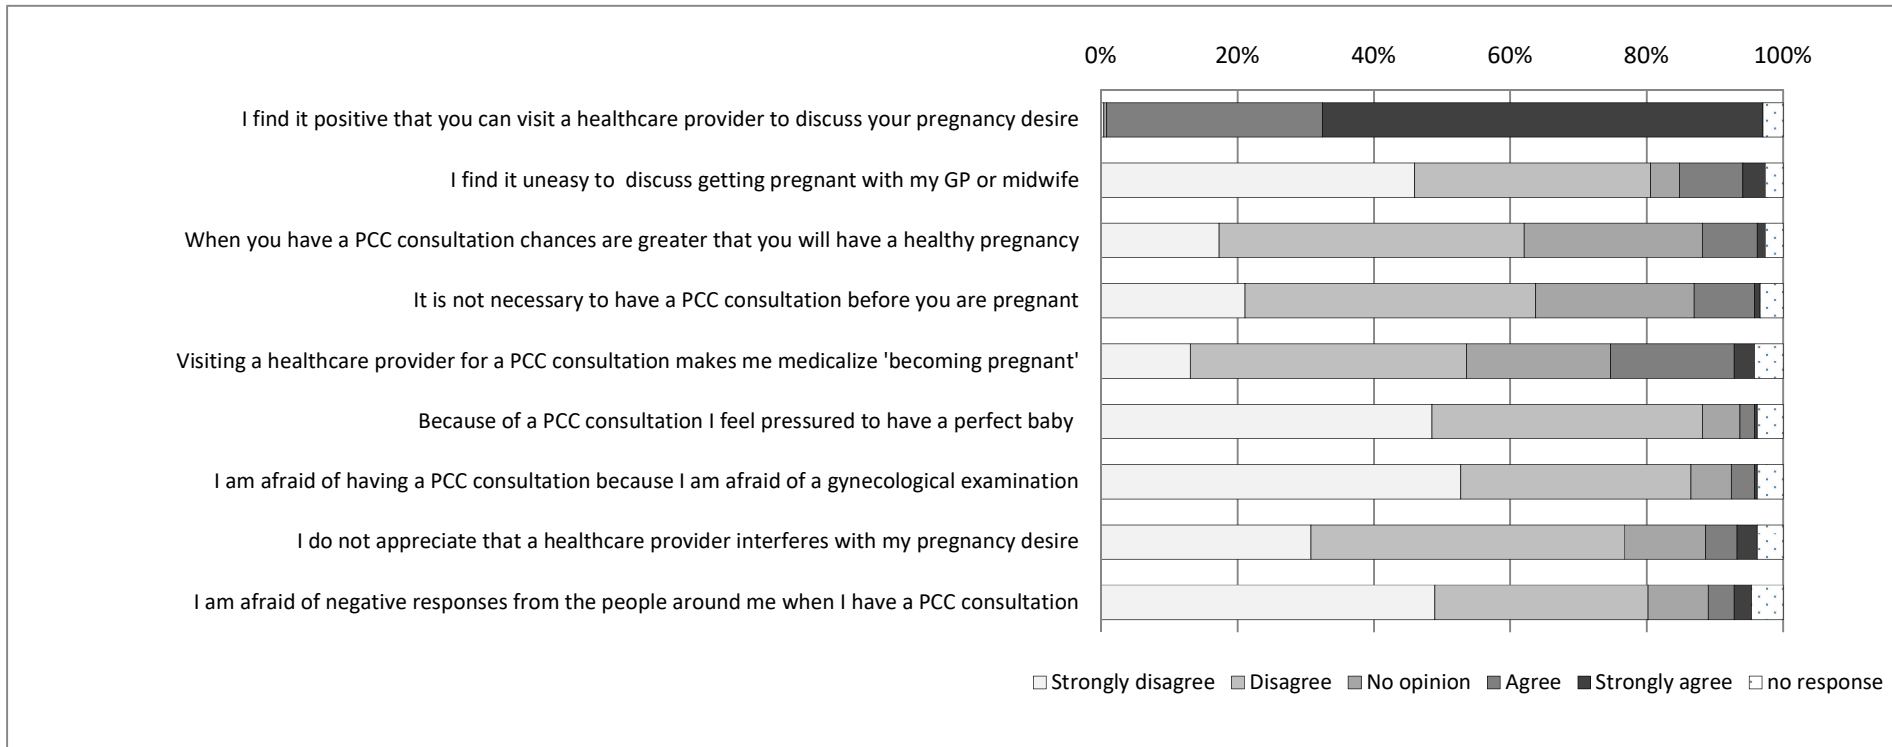

Figure 3. Knowledge outcome per statement

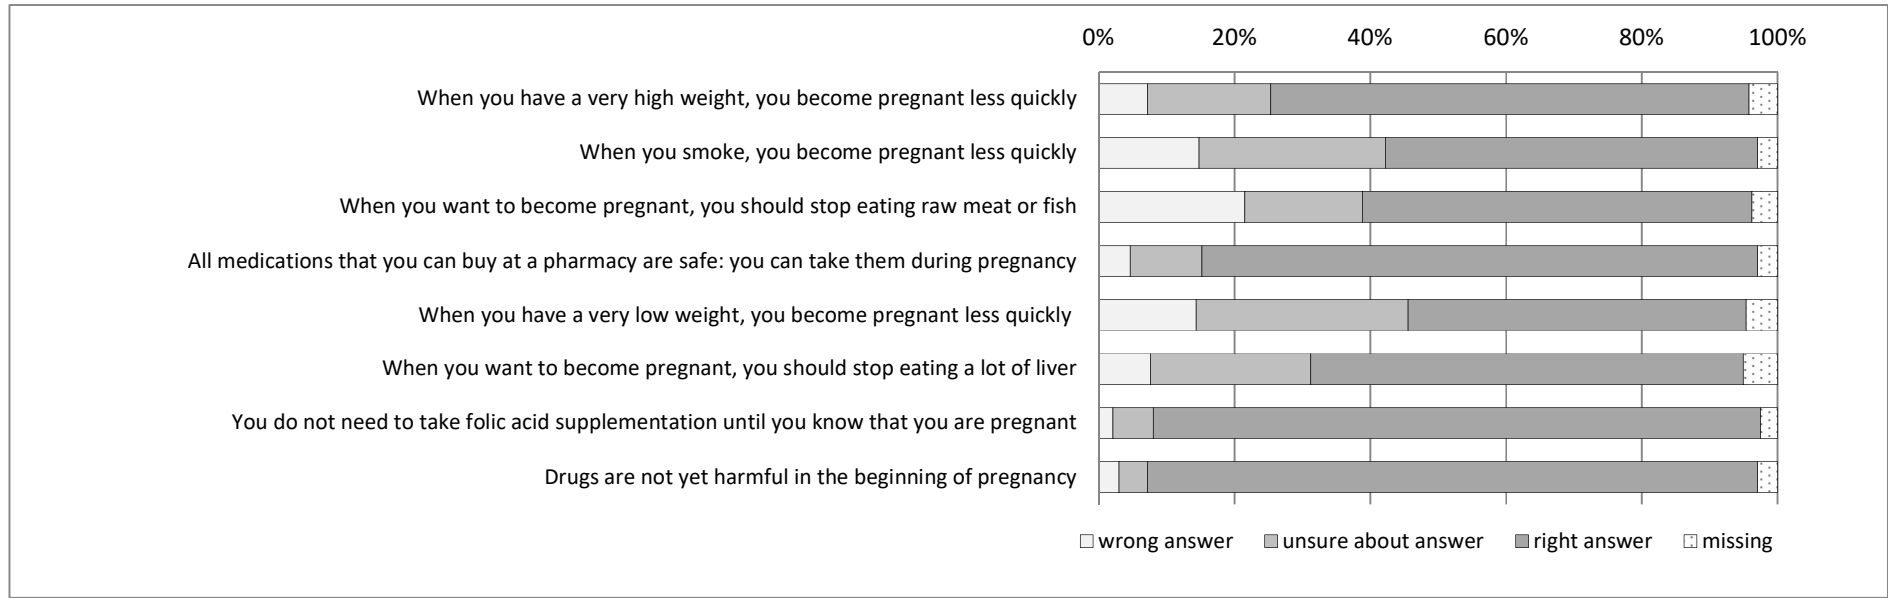

Supplement: MOESM5 [file 16415616]
